# Supplementary material
Source: PubMed Central journal article supplement (PMC8060901)
Supplement: 10903_2021_1201_MOESM1_ESM.pdf [file 10903_2021_1201_MOESM1_ESM.pdf]

**Supplementary Table 1. Summary of candidate DNAm sites in DPREG**

| CpG methylated region | N Systolic | Beta Systolic | Standard Error Systolic | Unadjusted p-value Systolic | N Diastolic | Beta Diastolic | Standard Error Diastolic | Unadjusted p-value Diastolic | CHR | Base pair position | Gene         |
|-----------------------|------------|---------------|-------------------------|-----------------------------|-------------|----------------|--------------------------|------------------------------|-----|--------------------|--------------|
| cg00101629            | 93         | -4.691E-04    | 3.348E-04               | 0.166                       | 93          | 1.410E-04      | 4.438E-04                | 0.752                        | 1   | 15068966           | KAZN         |
| cg01142526            | 93         | 4.310E-05     | 1.369E-04               | 0.754                       | 93          | 1.050E-04      | 1.789E-04                | 0.560                        | 5   | 177541754          | N4BP3        |
| cg01476222            | 93         | 3.538E-04     | 2.782E-04               | 0.208                       | 93          | 1.490E-05      | 3.681E-04                | 0.968                        | 11  | 36522143           | TRAF6        |
| cg01621943            | 93         | -2.370E-05    | 3.177E-04               | 0.941                       | 93          | -5.374E-04     | 4.112E-04                | 0.196                        | 17  | 53531409           |              |
| cg03152187            | 93         | 3.657E-04     | 2.242E-04               | 0.108                       | 93          | 4.801E-04      | 2.935E-04                | 0.107                        | 17  | 75417165           | SEPT9        |
| cg03254336            | 93         | -3.221E-04    | 2.964E-04               | 0.281                       | 93          | -3.197E-04     | 3.893E-04                | 0.415                        | 10  | 114635839          |              |
| cg03272932            | 93         | -1.220E-04    | 3.256E-04               | 0.709                       | 93          | -2.141E-04     | 4.259E-04                | 0.617                        | 16  | 87588893           |              |
| cg03706951            | 93         | -8.030E-05    | 4.133E-04               | 0.846                       | 93          | -5.158E-04     | 5.379E-04                | 0.341                        | 17  | 39465518           | KRTAP16-1    |
| cg03901454            | 93         | -2.265E-04    | 3.199E-04               | 0.482                       | 93          | -5.144E-04     | 4.160E-04                | 0.221                        | 16  | 87588683           |              |
| cg04212285            | 93         | -4.715E-04    | 5.295E-04               | 0.377                       | 93          | -6.200E-06     | 6.994E-04                | 0.993                        | 7   | 157342638          | PTPRN2       |
| cg04549583            | 93         | -1.244E-04    | 1.501E-04               | 0.410                       | 93          | -6.380E-05     | 1.972E-04                | 0.747                        | 2   | 12146219           | LOC100506457 |
| cg06320380            | 93         | -4.890E-06    | 1.469E-04               | 0.974                       | 93          | 8.690E-05      | 1.921E-04                | 0.653                        | 2   | 218770208          | TNS1         |
| cg09964921            | 93         | 4.599E-04     | 3.592E-04               | 0.205                       | 93          | 4.792E-04      | 4.721E-04                | 0.314                        | 21  | 35885767           | KCNE1        |
| cg10131972            | 93         | 3.384E-04     | 1.817E-04               | 0.067                       | 93          | 4.618E-04      | 2.387E-04                | 0.057                        | 22  | 19879787           | TXNRD2       |
| cg13250001            | 93         | 2.554E-04     | 1.791E-04               | 0.159                       | 93          | 1.576E-04      | 2.369E-04                | 0.508                        | 3   | 119810597          | GSK3B        |
| cg13290254            | 93         | -2.366E-04    | 3.965E-04               | 0.553                       | 93          | -2.429E-04     | 5.161E-04                | 0.639                        | 12  | 125197730          |              |
| cg13514049            | 93         | 1.010E-04     | 3.573E-04               | 0.778                       | 93          | -2.280E-04     | 4.672E-04                | 0.627                        | 9   | 110495709          |              |
| cg16447680            | 93         | -1.955E-04    | 2.885E-04               | 0.501                       | 93          | -1.736E-04     | 3.784E-04                | 0.648                        | 12  | 55379100           | TESPA1       |
| cg18721397            | 93         | -5.389E-04    | 8.616E-04               | 0.534                       | 93          | -6.201E-04     | 1.129E-03                | 0.585                        | 5   | 32584912           | SUB1         |
| cg19787650            | 93         | -4.340E-05    | 3.259E-04               | 0.894                       | 93          | -1.101E-04     | 4.265E-04                | 0.797                        | 8   | 130998171          | FAM49B       |
| cg19921917            | 93         | -6.820E-04    | 5.935E-04               | 0.255                       | 93          | -1.343E-03     | 7.683E-04                | 0.085                        | 4   | 169418224          | PALLD        |
| cg20253872            | 93         | 3.760E-04     | 2.526E-04               | 0.141                       | 93          | 5.068E-04      | 3.287E-04                | 0.128                        | 1   | 110166571          | AMPD2        |
| cg20519581            | 93         | 1.723E-04     | 4.290E-04               | 0.689                       | 93          | 4.804E-04      | 5.567E-04                | 0.391                        | 20  | 48959844           |              |
| cg23471393            | 93         | -3.861E-04    | 4.740E-04               | 0.418                       | 93          | -2.447E-04     | 6.089E-04                | 0.689                        | 17  | 79797038           |              |
|                       |            |               |                         |                             |             |                |                          |                              |     |                    |              |

**Supplementary Table 2. Summary of preterm birth associated DNAm sites compared to previous research (Parets, 2013)**

| CpG methylated region | N Systolic | Beta Systolic | Standard Error Systolic | Unadjusted p-value Systolic | N Diastolic | Beta Diastolic | Standard Error Diastolic | Unadjusted p-value Diastolic | CHR | Base pair position | Gene |
|-----------------------|------------|---------------|-------------------------|-----------------------------|-------------|----------------|--------------------------|------------------------------|-----|--------------------|------|
| cg00078085            | 93         | 1.699E-04     | 2.975E-04               | 5.700E-01                   | 93          | 2.598E-04      | 3.892E-04                | 5.069E-01                    | 3   | 8810592            | OXTR |
| cg00385883            | 93         | 5.820E-05     | 1.442E-04               | 6.880E-01                   | 93          | 4.190E-05      | 1.889E-04                | 8.253E-01                    | 3   | 8808259            | OXTR |
| cg02192228            | 93         | 5.517E-04     | 5.180E-04               | 2.908E-01                   | 93          | 2.245E-04      | 6.827E-04                | 7.434E-01                    | 3   | 8809536            | OXTR |
| cg03257388            | 93         | 3.889E-04     | 8.554E-04               | 6.509E-01                   | 93          | -2.962E-04     | 1.121E-03                | 7.924E-01                    | 3   | 8809213            | OXTR |
| cg03987506            | 93         | -1.526E-04    | 2.908E-04               | 6.016E-01                   | 93          | -2.162E-04     | 3.805E-04                | 5.720E-01                    | 3   | 8810549            | OXTR |
| cg04523291            | 93         | 2.110E-04     | 8.290E-04               | 7.999E-01                   | 93          | -9.230E-05     | 1.086E-03                | 9.325E-01                    | 3   | 8809501            | OXTR |
| cg09353063            | 93         | 2.900E-05     | 1.732E-04               | 8.678E-01                   | 93          | -2.756E-04     | 2.246E-04                | 2.243E-01                    | 3   | 8811092            | OXTR |
| cg11171527            | 93         | 3.938E-04     | 2.348E-04               | 9.841E-02                   | 93          | 5.851E-04      | 3.057E-04                | 6.014E-02                    | 3   | 8810206            | OXTR |
| cg11589699            | 93         | 4.026E-04     | 1.658E-04               | 1.801E-02                   | 93          | 6.419E-04      | 2.129E-04                | 3.684E-03                    | 3   | 8806317            | OXTR |
| cg12695586            | 93         | 1.704E-04     | 2.095E-04               | 4.191E-01                   | 93          | 1.609E-04      | 2.748E-04                | 5.604E-01                    | 3   | 8810077            | OXTR |
| cg13079193            | 93         | 2.251E-04     | 3.383E-04               | 5.081E-01                   | 93          | 4.001E-04      | 4.417E-04                | 3.684E-01                    | 3   | 8802718            | OXTR |
| cg15317815            | 93         | 9.224E-04     | 9.272E-04               | 3.236E-01                   | 93          | 5.584E-04      | 1.220E-03                | 6.487E-01                    | 3   | 8809306            | OXTR |
| cg17285225            | 93         | -9.690E-05    | 1.085E-04               | 3.753E-01                   | 93          | -9.310E-05     | 1.424E-04                | 5.158E-01                    | 3   | 8811004            | OXTR |
| cg19619174            | 93         | 7.590E-05     | 1.397E-04               | 5.890E-01                   | 93          | 8.590E-05      | 1.803E-04                | 6.355E-01                    | 3   | 8810139            | OXTR |
| cg23391006            | 93         | -9.370E-05    | 8.000E-05               | 2.458E-01                   | 93          | 5.140E-06      | 1.037E-04                | 9.606E-01                    | 3   | 8811279            | OXTR |
| cg26455676            | 93         | 4.510E-05     | 3.654E-04               | 9.023E-01                   | 93          | 4.526E-04      | 4.755E-04                | 3.447E-01                    | 3   | 8797459            | OXTR |
| cg00425217            | 93         | 1.272E-04     | 1.769E-04               | 4.747E-01                   | 93          | 3.465E-04      | 2.289E-04                | 1.350E-01                    | 19  | 13205470           | NFIX |
| cg00689651            | 93         | 6.150E-05     | 2.338E-04               | 7.935E-01                   | 93          | -2.710E-05     | 3.062E-04                | 9.298E-01                    | 19  | 13209548           | NFIX |
| cg01001422            | 93         | 4.630E-05     | 5.635E-04               | 9.348E-01                   | 93          | 2.825E-04      | 7.383E-04                | 7.033E-01                    | 19  | 13135631           | NFIX |
| cg01617040            | 93         | 2.599E-04     | 1.991E-04               | 1.966E-01                   | 93          | 4.403E-04      | 2.587E-04                | 9.360E-02                    | 19  | 13172859           | NFIX |
| cg02297936            | 93         | 1.019E-04     | 2.224E-04               | 6.482E-01                   | 93          | 3.953E-04      | 2.880E-04                | 1.746E-01                    | 19  | 13208599           | NFIX |
| cg03214274            | 93         | 1.729E-04     | 1.810E-04               | 3.430E-01                   | 93          | 1.205E-04      | 2.377E-04                | 6.139E-01                    | 19  | 13179476           | NFIX |
| cg03330161            | 93         | -2.258E-04    | 2.379E-04               | 3.460E-01                   | 93          | -1.884E-04     | 3.125E-04                | 5.488E-01                    | 19  | 13181605           | NFIX |
| cg03759890            | 93         | -2.569E-04    | 3.583E-04               | 4.761E-01                   | 93          | -3.976E-04     | 4.684E-04                | 3.991E-01                    | 19  | 13143279           | NFIX |
| cg04189679            | 93         | 3.600E-05     | 3.033E-04               | 9.060E-01                   | 93          | 1.607E-04      | 3.967E-04                | 6.867E-01                    | 19  | 13138055           | NFIX |
| cg05502283            | 93         | -7.270E-05    | 1.760E-04               | 6.811E-01                   | 93          | -1.824E-04     | 2.270E-04                | 4.247E-01                    | 19  | 13203715           | NFIX |
| cg06623219            | 93         | -1.500E-05    | 2.985E-04               | 9.602E-01                   | 93          | 3.909E-04      | 3.882E-04                | 3.178E-01                    | 19  | 13207502           | NFIX |
| cg06623668            | 93         | -1.994E-04    | 3.048E-04               | 5.153E-01                   | 93          | 1.020E-05      | 4.001E-04                | 9.798E-01                    | 19  | 13138816           | NFIX |
| cg06744585            | 93         | -4.192E-04    | 6.097E-04               | 4.942E-01                   | 93          | -8.442E-04     | 7.914E-04                | 2.901E-01                    | 19  | 13135808           | NFIX |
| cg07111635            | 93         | -1.330E-03    | 2.300E-03               | 5.651E-01                   | 93          | -3.912E-03     | 2.984E-03                | 1.945E-01                    | 19  | 13163575           | NFIX |
| cg07240953            | 93         | 4.289E-04     | 4.933E-04               | 3.878E-01                   | 93          | 8.319E-04      | 6.419E-04                | 1.997E-01                    | 19  | 13194770           | NFIX |

|            |    |            |           |           |    |            |           |           |    |           |         |
|------------|----|------------|-----------|-----------|----|------------|-----------|-----------|----|-----------|---------|
| cg07788061 | 93 | 4.170E-04  | 2.084E-04 | 4.962E-02 | 93 | 7.497E-04  | 2.659E-04 | 6.404E-03 | 19 | 13207239  | NFIX    |
| cg08052226 | 93 | -8.102E-04 | 4.310E-04 | 6.472E-02 | 93 | -3.103E-04 | 5.690E-04 | 5.874E-01 | 19 | 13207993  | NFIX    |
| cg08740546 | 93 | -2.361E-04 | 3.084E-04 | 4.467E-01 | 93 | -2.614E-04 | 3.983E-04 | 5.140E-01 | 19 | 13155548  | NFIX    |
| cg09331335 | 93 | -2.010E-04 | 2.069E-04 | 3.349E-01 | 93 | -3.712E-04 | 2.675E-04 | 1.701E-01 | 19 | 13209485  | NFIX    |
| cg09883779 | 93 | 1.995E-04  | 2.268E-04 | 3.823E-01 | 93 | 2.044E-04  | 2.975E-04 | 4.946E-01 | 19 | 13177929  | NFIX    |
| cg10300991 | 93 | -5.122E-04 | 2.272E-04 | 2.760E-02 | 93 | -2.906E-04 | 3.055E-04 | 3.450E-01 | 19 | 13174538  | NFIX    |
| cg10809147 | 93 | 1.040E-05  | 1.955E-04 | 9.577E-01 | 93 | 3.712E-04  | 2.482E-04 | 1.397E-01 | 19 | 13169186  | NFIX    |
| cg11758861 | 93 | -2.470E-05 | 1.583E-04 | 8.765E-01 | 93 | 1.040E-05  | 2.073E-04 | 9.603E-01 | 19 | 13135514  | NFIX    |
| cg11796565 | 93 | -3.806E-04 | 4.282E-04 | 3.775E-01 | 93 | -5.719E-04 | 5.597E-04 | 3.108E-01 | 19 | 13205681  | NFIX    |
| cg12685962 | 93 | 2.785E-04  | 3.427E-04 | 4.194E-01 | 93 | 1.972E-04  | 4.501E-04 | 6.627E-01 | 19 | 13144918  | NFIX    |
| cg12891836 | 93 | -2.749E-04 | 2.051E-04 | 1.847E-01 | 93 | -2.542E-04 | 2.704E-04 | 3.507E-01 | 19 | 13161341  | NFIX    |
| cg13077190 | 93 | 1.110E-05  | 1.558E-04 | 9.432E-01 | 93 | -1.007E-04 | 2.029E-04 | 6.214E-01 | 19 | 13162891  | NFIX    |
| cg13649253 | 93 | 1.454E-04  | 2.258E-04 | 5.219E-01 | 93 | -1.021E-04 | 2.931E-04 | 7.287E-01 | 19 | 13198798  | NFIX    |
| cg17145190 | 93 | 1.101E-04  | 1.721E-04 | 5.245E-01 | 93 | 1.826E-04  | 2.223E-04 | 4.145E-01 | 19 | 13197029  | NFIX    |
| cg17344906 | 93 | 5.832E-04  | 5.114E-04 | 2.583E-01 | 93 | 4.568E-04  | 6.693E-04 | 4.974E-01 | 19 | 13202507  | NFIX    |
| cg17368800 | 93 | 3.216E-04  | 1.989E-04 | 1.108E-01 | 93 | 4.599E-04  | 2.595E-04 | 8.116E-02 | 19 | 13188366  | NFIX    |
| cg17976191 | 93 | -2.350E-05 | 2.416E-04 | 9.228E-01 | 93 | -3.761E-04 | 3.118E-04 | 2.321E-01 | 19 | 13135527  | NFIX    |
| cg18299835 | 93 | 3.870E-05  | 1.868E-04 | 8.364E-01 | 93 | 1.639E-04  | 2.439E-04 | 5.042E-01 | 19 | 13207445  | NFIX    |
| cg18427308 | 93 | -1.306E-04 | 2.203E-04 | 5.554E-01 | 93 | 1.420E-04  | 2.839E-04 | 6.187E-01 | 19 | 13142463  | NFIX    |
| cg18480977 | 93 | 1.218E-04  | 1.758E-04 | 4.910E-01 | 93 | 1.906E-04  | 2.307E-04 | 4.118E-01 | 19 | 13182850  | NFIX    |
| cg19611364 | 93 | -1.112E-04 | 4.268E-04 | 7.953E-01 | 93 | -1.959E-04 | 5.509E-04 | 7.233E-01 | 19 | 13135494  | NFIX    |
| cg20116828 | 93 | -6.500E-05 | 3.105E-04 | 8.349E-01 | 93 | 4.443E-04  | 4.034E-04 | 2.748E-01 | 19 | 13207602  | NFIX    |
| cg23518986 | 93 | -1.131E-04 | 1.131E-04 | 3.211E-01 | 93 | -1.557E-04 | 1.451E-04 | 2.875E-01 | 19 | 13209470  | NFIX    |
| cg24158442 | 93 | 1.112E-04  | 2.817E-04 | 6.942E-01 | 93 | -2.617E-04 | 3.679E-04 | 4.795E-01 | 19 | 13140977  | NFIX    |
| cg24277817 | 93 | 8.570E-05  | 6.176E-04 | 8.900E-01 | 93 | 1.619E-04  | 7.987E-04 | 8.400E-01 | 19 | 13135662  | NFIX    |
| cg24339219 | 93 | -1.918E-04 | 1.546E-04 | 2.192E-01 | 93 | 1.375E-04  | 2.038E-04 | 5.022E-01 | 19 | 13149516  | NFIX    |
| cg25343560 | 93 | 6.109E-04  | 4.419E-04 | 1.716E-01 | 93 | 2.606E-04  | 5.851E-04 | 6.576E-01 | 19 | 13155130  | NFIX    |
| cg25394801 | 93 | -1.077E-04 | 2.848E-04 | 7.066E-01 | 93 | -8.710E-06 | 3.732E-04 | 9.815E-01 | 19 | 13147655  | NFIX    |
| cg25417223 | 93 | 4.278E-04  | 5.411E-04 | 4.321E-01 | 93 | -5.944E-04 | 6.995E-04 | 3.987E-01 | 19 | 13209306  | NFIX    |
| cg26767614 | 93 | -2.307E-04 | 2.391E-04 | 3.381E-01 | 93 | -2.722E-04 | 3.134E-04 | 3.884E-01 | 19 | 13136168  | NFIX    |
| cg27635771 | 93 | 2.770E-05  | 2.435E-04 | 9.097E-01 | 93 | 2.105E-04  | 3.178E-04 | 5.102E-01 | 19 | 13170076  | NFIX    |
| cg01427268 | 93 | 6.737E-04  | 3.171E-04 | 3.748E-02 | 93 | 7.604E-04  | 4.154E-04 | 7.180E-02 | 4  | 160252652 | RAPGEF2 |
| cg01779906 | 93 | 1.013E-03  | 4.907E-04 | 4.303E-02 | 93 | 1.742E-03  | 6.270E-04 | 7.164E-03 | 4  | 160195650 | RAPGEF2 |
| cg02898059 | 93 | 4.688E-04  | 2.535E-04 | 6.898E-02 | 93 | 6.061E-04  | 3.289E-04 | 7.001E-02 | 4  | 160264661 | RAPGEF2 |

|            |    |            |           |           |    |            |           |           |    |           |         |
|------------|----|------------|-----------|-----------|----|------------|-----------|-----------|----|-----------|---------|
| cg02903498 | 93 | -5.870E-04 | 6.291E-04 | 3.543E-01 | 93 | 1.371E-03  | 8.131E-04 | 9.666E-02 | 4  | 160263268 | RAPGEF2 |
| cg02968883 | 93 | -1.951E-04 | 7.800E-05 | 1.498E-02 | 93 | -1.057E-04 | 1.078E-04 | 3.308E-01 | 4  | 160277142 | RAPGEF2 |
| cg03351978 | 93 | 4.223E-04  | 3.568E-04 | 2.409E-01 | 93 | 5.685E-04  | 4.627E-04 | 2.237E-01 | 4  | 160230280 | RAPGEF2 |
| cg03431482 | 93 | 6.330E-05  | 2.935E-04 | 8.298E-01 | 93 | 3.418E-04  | 3.823E-04 | 3.746E-01 | 4  | 160215429 | RAPGEF2 |
| cg04250661 | 93 | -1.591E-04 | 4.013E-04 | 6.930E-01 | 93 | -4.689E-04 | 5.159E-04 | 3.668E-01 | 4  | 160199879 | RAPGEF2 |
| cg04399899 | 93 | 6.180E-07  | 3.113E-04 | 9.984E-01 | 93 | -5.620E-05 | 4.020E-04 | 8.893E-01 | 4  | 160189254 | RAPGEF2 |
| cg04696208 | 93 | -2.933E-04 | 3.021E-04 | 3.354E-01 | 93 | 3.310E-05  | 3.969E-04 | 9.337E-01 | 4  | 160266334 | RAPGEF2 |
| cg05187155 | 93 | 3.590E-06  | 1.682E-04 | 9.831E-01 | 93 | 2.114E-04  | 2.189E-04 | 3.376E-01 | 4  | 160280029 | RAPGEF2 |
| cg05924733 | 93 | 1.528E-04  | 1.928E-04 | 4.309E-01 | 93 | 1.380E-05  | 2.534E-04 | 9.569E-01 | 4  | 160277162 | RAPGEF2 |
| cg07187641 | 93 | 3.054E-04  | 2.783E-04 | 2.766E-01 | 93 | 1.178E-04  | 3.636E-04 | 7.471E-01 | 4  | 160212040 | RAPGEF2 |
| cg08872866 | 93 | 1.568E-04  | 3.170E-04 | 6.226E-01 | 93 | -3.030E-05 | 4.157E-04 | 9.421E-01 | 4  | 160279539 | RAPGEF2 |
| cg09051794 | 93 | -2.618E-04 | 5.437E-04 | 6.318E-01 | 93 | -2.046E-04 | 7.125E-04 | 7.749E-01 | 4  | 160216717 | RAPGEF2 |
| cg09495517 | 93 | -1.632E-04 | 2.235E-04 | 4.681E-01 | 93 | -5.810E-05 | 2.936E-04 | 8.436E-01 | 4  | 160266803 | RAPGEF2 |
| cg09614179 | 93 | -6.060E-05 | 2.054E-04 | 7.690E-01 | 93 | -6.240E-05 | 2.690E-04 | 8.172E-01 | 4  | 160264255 | RAPGEF2 |
| cg12305855 | 93 | -2.387E-04 | 3.329E-04 | 4.760E-01 | 93 | -1.690E-04 | 4.368E-04 | 7.002E-01 | 4  | 160216262 | RAPGEF2 |
| cg13155469 | 93 | -9.357E-04 | 4.501E-04 | 4.162E-02 | 93 | -9.844E-04 | 5.952E-04 | 1.030E-01 | 4  | 160270640 | RAPGEF2 |
| cg13216597 | 93 | 2.134E-04  | 3.287E-04 | 5.184E-01 | 93 | 3.139E-04  | 4.299E-04 | 4.680E-01 | 4  | 160217706 | RAPGEF2 |
| cg13258313 | 93 | -6.820E-05 | 1.366E-04 | 6.194E-01 | 93 | 7.410E-05  | 1.789E-04 | 6.800E-01 | 4  | 160266429 | RAPGEF2 |
| cg14559229 | 93 | 3.829E-04  | 4.945E-04 | 4.416E-01 | 93 | 4.086E-04  | 6.376E-04 | 5.239E-01 | 4  | 160201600 | RAPGEF2 |
| cg16055817 | 93 | 1.039E-03  | 1.074E-03 | 3.367E-01 | 93 | 6.020E-05  | 1.425E-03 | 9.664E-01 | 4  | 160277110 | RAPGEF2 |
| cg16882824 | 93 | -3.080E-05 | 2.229E-04 | 8.905E-01 | 93 | 4.320E-06  | 2.918E-04 | 9.882E-01 | 4  | 160193163 | RAPGEF2 |
| cg19135406 | 93 | -6.730E-05 | 4.381E-04 | 8.784E-01 | 93 | -4.890E-04 | 5.762E-04 | 3.992E-01 | 4  | 160219852 | RAPGEF2 |
| cg24435971 | 93 | -1.037E-04 | 1.681E-04 | 5.394E-01 | 93 | -1.512E-04 | 2.199E-04 | 4.941E-01 | 4  | 160215959 | RAPGEF2 |
| cg24884856 | 93 | -4.260E-05 | 4.576E-04 | 9.261E-01 | 93 | 4.438E-04  | 6.047E-04 | 4.657E-01 | 4  | 160203265 | RAPGEF2 |
| cg25121721 | 93 | 5.119E-04  | 5.321E-04 | 3.397E-01 | 93 | 6.450E-04  | 6.970E-04 | 3.582E-01 | 4  | 160218463 | RAPGEF2 |
| cg26204575 | 93 | 1.139E-04  | 1.899E-04 | 5.506E-01 | 93 | -5.480E-05 | 2.491E-04 | 8.264E-01 | 4  | 160213440 | RAPGEF2 |
| cg01030886 | 93 | -7.900E-05 | 3.741E-04 | 8.334E-01 | 93 | -7.980E-06 | 4.899E-04 | 9.870E-01 | 12 | 65766936  | MSRB3   |
| cg01104960 | 93 | -9.820E-05 | 4.292E-04 | 8.198E-01 | 93 | 5.870E-05  | 5.621E-04 | 9.171E-01 | 12 | 65674264  | MSRB3   |
| cg01531701 | 93 | 5.098E-04  | 4.975E-04 | 3.094E-01 | 93 | -4.557E-04 | 6.427E-04 | 4.808E-01 | 12 | 65675516  | MSRB3   |
| cg04034644 | 93 | 3.046E-04  | 3.162E-04 | 3.390E-01 | 93 | 2.400E-05  | 4.165E-04 | 9.542E-01 | 12 | 65825192  | MSRB3   |
| cg04094162 | 93 | 5.216E-04  | 3.875E-04 | 1.830E-01 | 93 | 5.002E-04  | 5.121E-04 | 3.323E-01 | 12 | 65675289  | MSRB3   |
| cg04104959 | 93 | 1.828E-04  | 4.862E-04 | 7.082E-01 | 93 | 1.386E-04  | 6.370E-04 | 8.285E-01 | 12 | 65674363  | MSRB3   |
| cg04204737 | 93 | 2.815E-04  | 3.088E-04 | 3.654E-01 | 93 | 2.588E-04  | 4.054E-04 | 5.255E-01 | 12 | 65707425  | MSRB3   |
| cg04525892 | 93 | -2.986E-04 | 2.265E-04 | 1.922E-01 | 93 | -3.072E-04 | 2.979E-04 | 3.062E-01 | 12 | 65822627  | MSRB3   |

|            |    |            |           |           |    |            |           |           |    |          |       |
|------------|----|------------|-----------|-----------|----|------------|-----------|-----------|----|----------|-------|
| cg05475386 | 93 | -3.914E-04 | 4.025E-04 | 3.345E-01 | 93 | -1.090E-04 | 5.301E-04 | 8.377E-01 | 12 | 65723693 | MSRB3 |
| cg05697394 | 93 | -2.069E-04 | 3.668E-04 | 5.746E-01 | 93 | 7.520E-05  | 4.811E-04 | 8.763E-01 | 12 | 65701642 | MSRB3 |
| cg06700060 | 93 | 7.470E-06  | 2.582E-04 | 9.770E-01 | 93 | 2.705E-04  | 3.365E-04 | 4.245E-01 | 12 | 65859647 | MSRB3 |
| cg09387650 | 93 | -3.482E-04 | 3.377E-04 | 3.065E-01 | 93 | -3.030E-05 | 4.453E-04 | 9.460E-01 | 12 | 65713650 | MSRB3 |
| cg09421347 | 93 | -2.940E-05 | 8.410E-05 | 7.279E-01 | 93 | 2.330E-05  | 1.101E-04 | 8.334E-01 | 12 | 65673222 | MSRB3 |
| cg10442759 | 93 | -7.690E-05 | 7.590E-05 | 3.146E-01 | 93 | 3.530E-05  | 9.990E-05 | 7.249E-01 | 12 | 65673274 | MSRB3 |
| cg12269782 | 93 | -1.937E-04 | 2.566E-04 | 4.531E-01 | 93 | -1.419E-04 | 3.340E-04 | 6.725E-01 | 12 | 65737799 | MSRB3 |
| cg12708266 | 93 | 3.641E-04  | 3.168E-04 | 2.548E-01 | 93 | 4.548E-04  | 4.151E-04 | 2.773E-01 | 12 | 65702725 | MSRB3 |
| cg12747525 | 93 | 1.332E-04  | 2.856E-04 | 6.427E-01 | 93 | -1.353E-04 | 3.768E-04 | 7.206E-01 | 12 | 65675358 | MSRB3 |
| cg14571669 | 93 | -4.651E-04 | 5.500E-04 | 4.009E-01 | 93 | -5.424E-04 | 7.208E-04 | 4.544E-01 | 12 | 65756576 | MSRB3 |
| cg14609260 | 93 | -1.045E-03 | 4.728E-04 | 3.060E-02 | 93 | -9.616E-04 | 6.251E-04 | 1.289E-01 | 12 | 65859092 | MSRB3 |
| cg18130328 | 93 | 4.120E-05  | 2.458E-04 | 8.675E-01 | 93 | 1.855E-04  | 3.212E-04 | 5.656E-01 | 12 | 65720609 | MSRB3 |
| cg19365956 | 93 | 2.680E-05  | 3.025E-04 | 9.297E-01 | 93 | 1.533E-04  | 3.956E-04 | 6.996E-01 | 12 | 65721370 | MSRB3 |
| cg20315554 | 93 | 5.155E-04  | 5.028E-04 | 3.091E-01 | 93 | 4.613E-04  | 6.541E-04 | 4.832E-01 | 12 | 65676662 | MSRB3 |
| cg20845085 | 93 | 1.248E-04  | 2.465E-04 | 6.144E-01 | 93 | 4.586E-04  | 3.189E-04 | 1.553E-01 | 12 | 65728847 | MSRB3 |
| cg21614762 | 93 | 4.458E-04  | 5.963E-04 | 4.574E-01 | 93 | 7.984E-04  | 7.781E-04 | 3.087E-01 | 12 | 65674271 | MSRB3 |
| cg22559881 | 93 | 1.350E-05  | 4.450E-04 | 9.759E-01 | 93 | -6.384E-04 | 5.703E-04 | 2.671E-01 | 12 | 65700713 | MSRB3 |
| cg24890392 | 93 | -6.770E-05 | 2.323E-04 | 7.717E-01 | 93 | 4.320E-05  | 2.979E-04 | 8.853E-01 | 12 | 65721645 | MSRB3 |
| cg03279206 | 93 | -6.970E-05 | 1.796E-04 | 6.994E-01 | 93 | -1.746E-04 | 2.345E-04 | 4.593E-01 | 20 | 3064001  | AVP   |
| cg04360210 | 93 | 1.811E-04  | 8.950E-05 | 4.721E-02 | 93 | 1.634E-04  | 1.189E-04 | 1.741E-01 | 20 | 3064015  | AVP   |
| cg14065127 | 93 | -9.660E-05 | 7.950E-05 | 2.290E-01 | 93 | -1.643E-04 | 1.034E-04 | 1.169E-01 | 20 | 3063238  | AVP   |
| cg25551168 | 93 | 3.801E-04  | 1.997E-04 | 6.147E-02 | 93 | 6.416E-04  | 2.586E-04 | 1.573E-02 | 20 | 3065343  | AVP   |
| cg25673357 | 93 | 1.820E-05  | 1.094E-04 | 8.687E-01 | 93 | 2.265E-04  | 1.408E-04 | 1.127E-01 | 20 | 3063586  | AVP   |
| cg06404175 | 93 | -1.928E-04 | 1.909E-04 | 3.161E-01 | 93 | -2.710E-04 | 2.496E-04 | 2.817E-01 | 20 | 3052692  | OXT   |
| cg09774842 | 93 | -7.160E-05 | 1.840E-04 | 6.986E-01 | 93 | 1.552E-04  | 2.444E-04 | 5.275E-01 | 20 | 3052483  | OXT   |
| cg12099952 | 93 | -1.857E-04 | 1.265E-04 | 1.469E-01 | 93 | -1.227E-04 | 1.674E-04 | 4.662E-01 | 20 | 3053037  | OXT   |
| cg19592472 | 93 | -3.076E-04 | 7.124E-04 | 6.674E-01 | 93 | -2.597E-04 | 9.333E-04 | 7.817E-01 | 20 | 3052274  | OXT   |
| cg26955850 | 93 | -4.213E-04 | 5.073E-04 | 4.093E-01 | 93 | -1.005E-03 | 6.571E-04 | 1.312E-01 | 20 | 3052345  | OXT   |
| cg01071966 | 93 | 1.621E-04  | 2.384E-04 | 4.991E-01 | 93 | 1.311E-04  | 3.127E-04 | 6.763E-01 | 5  | 76248923 | CRHBP |
| cg02882540 | 93 | -3.207E-04 | 3.313E-04 | 3.367E-01 | 93 | -5.272E-04 | 4.331E-04 | 2.280E-01 | 5  | 76256334 | CRHBP |
| cg03286609 | 93 | 4.870E-05  | 5.562E-04 | 9.305E-01 | 93 | -4.362E-04 | 7.264E-04 | 5.503E-01 | 5  | 76252218 | CRHBP |
| cg04306063 | 93 | 7.020E-05  | 1.376E-04 | 6.117E-01 | 93 | 1.608E-04  | 1.795E-04 | 3.736E-01 | 5  | 76249502 | CRHBP |
| cg05620787 | 93 | 4.710E-04  | 2.657E-04 | 8.108E-02 | 93 | 6.752E-04  | 3.465E-04 | 5.569E-02 | 5  | 76264831 | CRHBP |
| cg07380705 | 93 | 2.990E-05  | 1.776E-04 | 8.668E-01 | 93 | -1.050E-05 | 2.326E-04 | 9.642E-01 | 5  | 76249897 | CRHBP |

|            |    |            |           |           |    |            |           |           |   |           |       |
|------------|----|------------|-----------|-----------|----|------------|-----------|-----------|---|-----------|-------|
| cg08792780 | 93 | -1.774E-04 | 3.246E-04 | 5.866E-01 | 93 | 1.430E-05  | 4.258E-04 | 9.734E-01 | 5 | 76249094  | CRHBP |
| cg10593758 | 93 | 2.551E-04  | 2.247E-04 | 2.605E-01 | 93 | 1.329E-04  | 2.963E-04 | 6.552E-01 | 5 | 76248743  | CRHBP |
| cg13157757 | 93 | -3.420E-05 | 2.036E-04 | 8.672E-01 | 93 | -1.451E-04 | 2.661E-04 | 5.875E-01 | 5 | 76250351  | CRHBP |
| cg13777717 | 93 | -3.286E-04 | 3.126E-04 | 2.972E-01 | 93 | -5.251E-04 | 4.078E-04 | 2.025E-01 | 5 | 76250527  | CRHBP |
| cg16545105 | 93 | -4.050E-05 | 4.200E-04 | 9.236E-01 | 93 | -4.749E-04 | 5.471E-04 | 3.886E-01 | 5 | 76248749  | CRHBP |
| cg17448335 | 93 | -4.320E-05 | 7.530E-05 | 5.683E-01 | 93 | -4.580E-05 | 9.860E-05 | 6.439E-01 | 5 | 76249776  | CRHBP |
| cg18419716 | 93 | -6.850E-05 | 6.791E-04 | 9.199E-01 | 93 | -3.153E-04 | 8.825E-04 | 7.220E-01 | 5 | 76254194  | CRHBP |
| cg18493242 | 93 | -8.478E-04 | 4.544E-04 | 6.665E-02 | 93 | -8.965E-04 | 5.996E-04 | 1.398E-01 | 5 | 76255050  | CRHBP |
| cg20214624 | 93 | -4.296E-04 | 3.716E-04 | 2.519E-01 | 93 | -1.312E-04 | 4.906E-04 | 7.900E-01 | 5 | 76254375  | CRHBP |
| cg21199406 | 93 | 2.267E-04  | 2.208E-04 | 3.084E-01 | 93 | 7.020E-05  | 2.855E-04 | 8.066E-01 | 5 | 76250201  | CRHBP |
| cg22323744 | 93 | 1.587E-04  | 2.852E-04 | 5.799E-01 | 93 | 4.509E-04  | 3.705E-04 | 2.281E-01 | 5 | 76248711  | CRHBP |
| cg26269677 | 93 | 6.706E-04  | 7.236E-04 | 3.575E-01 | 93 | -1.648E-04 | 9.395E-04 | 8.613E-01 | 5 | 76251688  | CRHBP |
| cg00601836 | 93 | -4.518E-04 | 1.110E-03 | 6.854E-01 | 93 | -8.192E-04 | 1.446E-03 | 5.730E-01 | 6 | 152130332 | ESR1  |
| cg00655307 | 93 | 3.810E-05  | 8.120E-05 | 6.405E-01 | 93 | 1.657E-04  | 1.039E-04 | 1.156E-01 | 6 | 152128743 | ESR1  |
| cg00920970 | 93 | -1.300E-04 | 1.181E-04 | 2.751E-01 | 93 | -1.160E-04 | 1.537E-04 | 4.532E-01 | 6 | 152129388 | ESR1  |
| cg00975240 | 93 | -1.156E-04 | 3.459E-04 | 7.392E-01 | 93 | 1.250E-04  | 4.530E-04 | 7.835E-01 | 6 | 152370564 | ESR1  |
| cg01735235 | 93 | -4.630E-05 | 3.694E-04 | 9.005E-01 | 93 | -2.701E-04 | 4.826E-04 | 5.776E-01 | 6 | 152135407 | ESR1  |
| cg01777019 | 93 | -1.300E-04 | 1.237E-04 | 2.970E-01 | 93 | -1.833E-04 | 1.617E-04 | 2.612E-01 | 6 | 152128805 | ESR1  |
| cg01901499 | 93 | -2.390E-04 | 2.088E-04 | 2.567E-01 | 93 | -1.707E-04 | 2.750E-04 | 5.370E-01 | 6 | 152376804 | ESR1  |
| cg02285263 | 93 | -4.390E-05 | 1.494E-04 | 7.699E-01 | 93 | 7.090E-05  | 1.956E-04 | 7.182E-01 | 6 | 152129749 | ESR1  |
| cg02404255 | 93 | -1.491E-04 | 3.150E-04 | 6.376E-01 | 93 | -5.999E-04 | 4.072E-04 | 1.456E-01 | 6 | 152419175 | ESR1  |
| cg02720618 | 93 | -1.103E-04 | 1.021E-04 | 2.839E-01 | 93 | 1.174E-04  | 1.380E-04 | 3.982E-01 | 6 | 152129791 | ESR1  |
| cg03037684 | 93 | 1.380E-03  | 5.804E-04 | 2.045E-02 | 93 | 7.070E-04  | 7.798E-04 | 3.680E-01 | 6 | 152421333 | ESR1  |
| cg03732055 | 93 | 6.217E-04  | 7.228E-04 | 3.929E-01 | 93 | 1.465E-03  | 9.357E-04 | 1.223E-01 | 6 | 152201038 | ESR1  |
| cg04418936 | 93 | -5.440E-06 | 2.951E-04 | 9.854E-01 | 93 | -1.000E-05 | 3.864E-04 | 9.793E-01 | 6 | 152388255 | ESR1  |
| cg04525653 | 93 | -3.727E-04 | 2.280E-04 | 1.070E-01 | 93 | -3.749E-04 | 3.006E-04 | 2.169E-01 | 6 | 152375589 | ESR1  |
| cg04718764 | 93 | -4.763E-04 | 4.061E-04 | 2.451E-01 | 93 | -3.708E-04 | 5.347E-04 | 4.906E-01 | 6 | 152235927 | ESR1  |
| cg05171584 | 93 | -2.066E-04 | 2.765E-04 | 4.577E-01 | 93 | 1.411E-04  | 3.629E-04 | 6.988E-01 | 6 | 152128535 | ESR1  |
| cg06877423 | 93 | -1.569E-04 | 4.540E-04 | 7.308E-01 | 93 | -1.926E-04 | 5.944E-04 | 7.470E-01 | 6 | 152200760 | ESR1  |
| cg08157080 | 93 | -2.678E-04 | 2.595E-04 | 3.059E-01 | 93 | -4.930E-06 | 3.492E-04 | 9.888E-01 | 6 | 152406734 | ESR1  |
| cg09414638 | 93 | -4.837E-04 | 6.251E-04 | 4.419E-01 | 93 | 2.313E-04  | 8.212E-04 | 7.791E-01 | 6 | 152239860 | ESR1  |
| cg09495438 | 93 | -5.820E-04 | 3.100E-04 | 6.499E-02 | 93 | -1.171E-03 | 4.022E-04 | 4.933E-03 | 6 | 152168125 | ESR1  |
| cg10804487 | 93 | -1.090E-05 | 2.581E-04 | 9.663E-01 | 93 | -1.404E-04 | 3.375E-04 | 6.788E-01 | 6 | 152136586 | ESR1  |
| cg10939667 | 93 | 2.241E-04  | 2.421E-04 | 3.581E-01 | 93 | 1.782E-04  | 3.181E-04 | 5.773E-01 | 6 | 152201611 | ESR1  |

|            |    |            |           |           |    |            |           |           |   |           |      |
|------------|----|------------|-----------|-----------|----|------------|-----------|-----------|---|-----------|------|
| cg11251858 | 93 | 1.931E-04  | 1.845E-04 | 2.994E-01 | 93 | 1.962E-04  | 2.423E-04 | 4.210E-01 | 6 | 152129036 | ESR1 |
| cg11813455 | 93 | 8.640E-05  | 1.199E-04 | 4.738E-01 | 93 | 2.114E-04  | 1.557E-04 | 1.793E-01 | 6 | 152128515 | ESR1 |
| cg12001846 | 93 | -5.421E-04 | 1.083E-03 | 6.185E-01 | 93 | -5.568E-04 | 1.419E-03 | 6.961E-01 | 6 | 152212815 | ESR1 |
| cg12209876 | 93 | -1.423E-04 | 1.736E-04 | 4.152E-01 | 93 | -2.901E-04 | 2.258E-04 | 2.034E-01 | 6 | 152381560 | ESR1 |
| cg12519939 | 93 | 8.910E-05  | 1.838E-04 | 6.295E-01 | 93 | -6.440E-05 | 2.407E-04 | 7.898E-01 | 6 | 152265431 | ESR1 |
| cg13889536 | 93 | 1.990E-05  | 2.746E-04 | 9.424E-01 | 93 | 1.961E-04  | 3.588E-04 | 5.867E-01 | 6 | 152417832 | ESR1 |
| cg15358019 | 93 | 4.774E-04  | 4.740E-04 | 3.177E-01 | 93 | 9.081E-04  | 6.159E-04 | 1.452E-01 | 6 | 152136221 | ESR1 |
| cg15390122 | 93 | -4.660E-05 | 6.321E-04 | 9.414E-01 | 93 | -4.001E-04 | 8.262E-04 | 6.299E-01 | 6 | 152130188 | ESR1 |
| cg15561702 | 93 | 3.631E-04  | 3.277E-04 | 2.719E-01 | 93 | -1.308E-04 | 4.376E-04 | 7.660E-01 | 6 | 152136576 | ESR1 |
| cg15626350 | 93 | 6.719E-04  | 9.165E-04 | 4.662E-01 | 93 | 1.510E-05  | 1.204E-03 | 9.900E-01 | 6 | 152130207 | ESR1 |
| cg15980539 | 93 | 2.070E-05  | 4.900E-05 | 6.735E-01 | 93 | 6.440E-05  | 6.380E-05 | 3.166E-01 | 6 | 152128865 | ESR1 |
| cg18024141 | 93 | -1.398E-04 | 2.510E-04 | 5.796E-01 | 93 | -2.458E-04 | 3.280E-04 | 4.564E-01 | 6 | 152232729 | ESR1 |
| cg18206764 | 93 | 6.408E-04  | 5.820E-04 | 2.750E-01 | 93 | 1.517E-03  | 7.783E-04 | 5.563E-02 | 6 | 152283837 | ESR1 |
| cg18509675 | 93 | 1.780E-05  | 1.880E-04 | 9.249E-01 | 93 | 3.834E-04  | 2.421E-04 | 1.182E-01 | 6 | 152411260 | ESR1 |
| cg19369424 | 93 | -1.126E-04 | 2.716E-04 | 6.799E-01 | 93 | -1.870E-04 | 3.501E-04 | 5.950E-01 | 6 | 152264237 | ESR1 |
| cg19411146 | 93 | 1.130E-04  | 2.445E-04 | 6.456E-01 | 93 | 4.281E-04  | 3.127E-04 | 1.757E-01 | 6 | 152128471 | ESR1 |
| cg20253551 | 93 | -3.360E-05 | 1.120E-04 | 7.648E-01 | 93 | 4.740E-05  | 1.466E-04 | 7.476E-01 | 6 | 152129400 | ESR1 |
| cg21017124 | 93 | -2.635E-04 | 2.283E-04 | 2.528E-01 | 93 | -3.438E-04 | 2.989E-04 | 2.544E-01 | 6 | 152320157 | ESR1 |
| cg21950534 | 93 | 3.612E-04  | 1.623E-04 | 2.959E-02 | 93 | 4.972E-04  | 2.117E-04 | 2.196E-02 | 6 | 152128483 | ESR1 |
| cg21969073 | 93 | 4.500E-05  | 9.930E-05 | 6.520E-01 | 93 | 8.560E-05  | 1.301E-04 | 5.129E-01 | 6 | 152129018 | ESR1 |
| cg23009221 | 93 | 2.532E-04  | 1.879E-04 | 1.826E-01 | 93 | 2.289E-04  | 2.476E-04 | 3.585E-01 | 6 | 152128588 | ESR1 |
| cg23467008 | 93 | -6.250E-05 | 1.011E-04 | 5.389E-01 | 93 | -1.316E-04 | 1.318E-04 | 3.218E-01 | 6 | 152128537 | ESR1 |
| cg24170716 | 93 | 3.338E-04  | 7.550E-04 | 6.599E-01 | 93 | -1.326E-04 | 9.896E-04 | 8.938E-01 | 6 | 152411971 | ESR1 |
| cg24900983 | 93 | 5.990E-05  | 1.780E-04 | 7.375E-01 | 93 | -1.396E-04 | 2.326E-04 | 5.505E-01 | 6 | 152128528 | ESR1 |
| cg27301701 | 93 | -3.599E-04 | 2.387E-04 | 1.366E-01 | 93 | -5.115E-04 | 3.117E-04 | 1.057E-01 | 6 | 152222460 | ESR1 |
| cg27316393 | 93 | -7.180E-05 | 1.155E-04 | 5.367E-01 | 93 | -4.140E-05 | 1.516E-04 | 7.856E-01 | 6 | 152128675 | ESR1 |
| cg27491370 | 93 | -3.096E-04 | 3.296E-04 | 3.510E-01 | 93 | -5.978E-04 | 4.285E-04 | 1.678E-01 | 6 | 152400061 | ESR1 |
